# Supplementary material for: Multifactorial Analysis of Endodontic Microsurgery Using Finite Element Models
Source: MDPI journal article supplement (doi:10.3390/jpm12061012), 2022-06-20
Supplement: s1 [file s1]

## Supplementary material

**Table S1** Mean and coefficient for each contribution in equation (1) (own influence and interactions).

|                                         | Coefficient                                     | Coefficient (MPa) | Influence (%) |
|-----------------------------------------|-------------------------------------------------|-------------------|---------------|
| Mean                                    | Mean                                            | 2.365625          |               |
| Own influence parameter                 | Material                                        | -0.235625         | 13.204904     |
|                                         | Preparation                                     | 0.539375          | 30.227671     |
|                                         | Resection                                       | 0.014375          | 0.805604      |
|                                         | Bone                                            | -0.154375         | 8.651489      |
| Interactions between parameters order 1 | Interaction material/preparation                | 0.028125          | 1.576182      |
|                                         | Interaction material/resection                  | -0.131875         | 7.390543      |
|                                         | Interaction material/bone                       | 0.021875          | 1.225919      |
|                                         | Interaction preparation/resection               | -0.236875         | 13.274956     |
|                                         | Interaction preparation/bone                    | -0.073125         | 4.098074      |
|                                         | Interaction resection/bone                      | -0.165625         | 9.281961      |
|                                         | Interaction material/preparation/resection      | -0.048125         | 2.697023      |
|                                         | Interaction material/preparation/bone           | 0.018125          | 1.015762      |
| Interactions between parameters order 2 | Interaction material/resection/bone             | 0.015625          | 0.875657      |
|                                         | Interaction preparation/resection/bone          | -0.089375         | 5.008757      |
| Interactions between parameters order 3 | Interaction material/preparation/resection/bone | 0.011875          | 0.665499      |
